# Supplementary material
Source: Springer Nature journal article supplement (https://www.springermedizin.de/resource/supplementary/12889_2010_3269_MOESM1_ESM.PDF/9488666)
Supplement: MOESM1 [file 9488666]

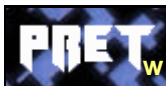

# Household Water Use Survey

HID:  Respondent CID: 

Date of interview: \_\_\_\_ / \_\_\_\_ / \_\_\_\_

Time of interview: \_\_\_\_ : \_\_\_\_ (24 hour clock)

Respondent Name: \_\_\_\_\_

Number of children less than age 5 in census: \_\_\_\_\_

**Start by observing the faces of the children in the household ages <5 years during census.**A. OBSERVE: *Did the mother start washing children as you came up to house?*1 ☐ Yes    2 ☐ NoB. OBSERVE: *Number of faces age less than 5 years observed:* \_\_\_\_\_C. OBSERVE: *Answer each of the following questions for each face observed:*

| Child's CID: | Eye crusting?                                                   | Nasal Discharge?                                                | Flies on face?                                                  |
|--------------|-----------------------------------------------------------------|-----------------------------------------------------------------|-----------------------------------------------------------------|
| C1.          | 1 <input type="checkbox"/> Yes    2 <input type="checkbox"/> No | 1 <input type="checkbox"/> Yes    2 <input type="checkbox"/> No | 1 <input type="checkbox"/> Yes    2 <input type="checkbox"/> No |
| C2.          | 1 <input type="checkbox"/> Yes    2 <input type="checkbox"/> No | 1 <input type="checkbox"/> Yes    2 <input type="checkbox"/> No | 1 <input type="checkbox"/> Yes    2 <input type="checkbox"/> No |
| C3.          | 1 <input type="checkbox"/> Yes    2 <input type="checkbox"/> No | 1 <input type="checkbox"/> Yes    2 <input type="checkbox"/> No | 1 <input type="checkbox"/> Yes    2 <input type="checkbox"/> No |
| C4.          | 1 <input type="checkbox"/> Yes    2 <input type="checkbox"/> No | 1 <input type="checkbox"/> Yes    2 <input type="checkbox"/> No | 1 <input type="checkbox"/> Yes    2 <input type="checkbox"/> No |
| C5.          | 1 <input type="checkbox"/> Yes    2 <input type="checkbox"/> No | 1 <input type="checkbox"/> Yes    2 <input type="checkbox"/> No | 1 <input type="checkbox"/> Yes    2 <input type="checkbox"/> No |

**Introduction: "We are interested in issues around water and water use in this village, and would like to ask you a few questions about water for your household".**

1. May we see where you store your water?

OBSERVE: 1a. *Number of storage containers:* \_\_\_\_\_1b. *Estimate size of largest container:* \_\_\_\_\_ (liters)1c. *Estimate the total amount of water in the household:* \_\_\_\_\_ (liters)

2. Where do you go to get your water?

1 ☐ Well2 ☐ Rain water catch3 ☐ Local lake4 ☐ Buy water5 ☐ Other, specify: \_\_\_\_\_

3. Do you have to pay anything for this water? Either when you get it, or some other fee?

1 ☐ Yes    If Yes, → 3a. How much do you have to pay? \_\_\_\_\_ (shillings)2 ☐ No

4. How long does it take you to walk one way from this house to this water source?

1 ☐ < 30 minutes2 ☐ 30 minutes to 1 hour3 ☐ >1 hour to 1.5 hours4 ☐ >1.5 hours to 2 hours5 ☐ More than two hours



# Household Water Use Survey

HID: 

5. Do you use another source of water in the dry season?

- 1 ☐ Yes If Yes, →  
2 ☐ No

5a. What is that source of water?

- 1 ☐ Well  
2 ☐ Rain water catch  
3 ☐ Local lake  
4 ☐ Buy water  
5 ☐ Other, specify: \_\_\_\_\_

5b. How long does it take you to walk one way from this house to this water source?

- 1 ☐ < 30 minutes  
2 ☐ 30 minutes to 1 hour  
3 ☐ >1 hour to 1.5 hours  
4 ☐ >1.5 hours to 2 hours  
5 ☐ More than two hours

6. Have you or a member of the household already gone for water today?

- 1 ☐ Yes

If yes, OBSERVE:

- 1 ☐ Containers are mostly full, SKIP TO QUESTION #7  
2 ☐ Containers are mostly empty, ASK the following:

6a. Have they already come back with water for today?

- 1 ☐ Yes  
2 ☐ No, they have not come back yet

- 2 ☐ No

If no, ASK...

6b. At what time of day do you or someone in the house usually go to get water?

- 1 ☐ Early morning (still dark to dawn)  
2 ☐ Late morning (dawn to noon)  
3 ☐ Early afternoon (noon to 3 pm)  
4 ☐ Late afternoon (3pm to dusk)  
5 ☐ Evening (dusk to dark)

## 7. RECONCILE AMOUNT OF WATER IN THE HOUSE

*If they have already just gotten water, but none is there, ASK:*

7. I see that you have already gotten water, yet none/very little is in the container.

Can you tell me what you used the water for already?

*Else, ASK the following:*

7. What do you use this water for? →

Prompt after each answer, "anything else?" until they say "nothing else". Mark all unused answers as NO.

- |                                         |                                |                               |
|-----------------------------------------|--------------------------------|-------------------------------|
| a. Drinking?                            | 1 <input type="checkbox"/> Yes | 2 <input type="checkbox"/> No |
| b. Cooking?                             | 1 <input type="checkbox"/> Yes | 2 <input type="checkbox"/> No |
| c. Washing clothes or dishes/objects    | 1 <input type="checkbox"/> Yes | 2 <input type="checkbox"/> No |
| d. <b>Washing hands or faces (body)</b> | 1 <input type="checkbox"/> Yes | 2 <input type="checkbox"/> No |
| e. Other, specify:                      |                                |                               |

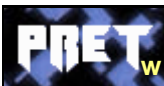

# Household Water Use Survey

HID: 

8. Water is pretty scarce in this area, and we know families use it wisely.

Who makes most of the decisions in this house about for what activities water can be used, like washing?

1 ☐ Head of household (male)

8a. Respondent? 1 ☐ Yes 2 ☐ No

*PROBE: for when the women can make decisions...*

8b. What if the (name of head of household) is away traveling,  
can (name of ☐female) make decisions about water use?

1 ☐ Yes 2 ☐ No

8c. Are there other situations where the woman can  
make decisions about water use? Please explain: \_\_\_\_\_

2 ☐ Head of household (female)

8a. Respondent? 1 ☐ Yes 2 ☐ No

3 ☐ Spouse (female)

8a. Respondent? 1 ☐ Yes 2 ☐ No

4 ☐ Other, specify: \_\_\_\_\_

9. Can children above age 5 years, for example, decide if they want  
water for drinking, or must they ask an adult in this household?

1 ☐ They can decide

2 ☐ They must ask

3 ☐ Other, specify: \_\_\_\_\_

10. Can children above age 5 years, for example, decide if they want water  
for washing, or must they ask an adult in this household?

1 ☐ They can decide

2 ☐ They must ask

3 ☐ Other, specify: \_\_\_\_\_

**Interviewer:** If question #7 mentions washing hands or face, then SKIP to question #12.

If question #7 does NOT mention washing hands or face, then ASK question #11.

11. You did not mention that you use the water I saw for washing hands or faces of children.

Is there another source of water that your household uses for washing hands and faces?

1 ☐ Yes

*If yes, ASK: 11a. Where is that source of water; may I see it?*

1 ☐ Source is another container in or around the house

2 ☐ Source is outside the house-a lake, or well, where you have to walk

3 ☐ They Refuse or Do Not Know

2 ☐ No

*If no, ASK: 11b. RECONCILE: Is it something that is done infrequently? Please explain:*

12. We understand that washing children is another chore, and uses water, which may be a problem. What are the main reasons you feel that children do not have their faces or hands washed every day?

*Prompt after each answer, "anything else?" until they say "nothing else".  
Mark all unused answers as NO.*

- |                                                    |                                |                               |
|----------------------------------------------------|--------------------------------|-------------------------------|
| a. Too busy with other chores                      | 1 <input type="checkbox"/> Yes | 2 <input type="checkbox"/> No |
| b. Water too scarce to use for washing             | 1 <input type="checkbox"/> Yes | 2 <input type="checkbox"/> No |
| c. No need to wash children - don't see importance | 1 <input type="checkbox"/> Yes | 2 <input type="checkbox"/> No |
| d. Danger to children in washing every day         | 1 <input type="checkbox"/> Yes | 2 <input type="checkbox"/> No |

- e. Other, specify:

*RECONCILE: Make sure it makes sense as a reason.*

13. How often does (name of child that you observe) have his/her face washed with water in a day?

1 ☐ Less than 1/day

2 ☐ 1 per day

3 ☐ More than 1/day

- 13a. When is the best time of day to wash the face?

1 ☐ Early morning (still dark to dawn)

2 ☐ Late morning (dawn to noon)

3 ☐ Early afternoon (noon to 3 pm)

4 ☐ Late afternoon (3pm to dusk)

5 ☐ Evening (dusk to dark)

- 13b. When are the best times of day to wash the face?

*Mark all unused answers as NO:*

- |                                       |                                |                               |
|---------------------------------------|--------------------------------|-------------------------------|
| a. Early morning (still dark to dawn) | 1 <input type="checkbox"/> Yes | 2 <input type="checkbox"/> No |
| b. Late morning (dawn to noon)        | 1 <input type="checkbox"/> Yes | 2 <input type="checkbox"/> No |
| c. Early afternoon (noon to 3 pm)     | 1 <input type="checkbox"/> Yes | 2 <input type="checkbox"/> No |
| d. Late afternoon (3pm to dusk)       | 1 <input type="checkbox"/> Yes | 2 <input type="checkbox"/> No |
| e. Evening (dusk to dark)             | 1 <input type="checkbox"/> Yes | 2 <input type="checkbox"/> No |

14. RECONCILE: *If kid has dirty eyes or nose, and allegedly has already been washed by time of interview, then PROBE:*  
Is there a reason why (Name of kid) does not seem clean now?

15. What could the leaders of this village do to make it easier for mothers of children to wash their children's faces each day? What would you like to see happen to make it easier?

RECONCILE ANSWER: *Make it clear that we are asking about what leadership could do.*

16. Are there things that the people of the village could do to make it easier to keep young children clean in this village?

RECONCILE ANSWER: *Make it clear that we are asking about what the people or families themselves could do.*

Finish: "Thank you for your time and effort."
